# Supplementary figures and images for: Autonomous and non-autonomous Shh signalling mediate the in vivo growth and guidance of mouse retinal ganglion cell axons
Source: Oxford University Press journal article supplement (doi:10.1242/dev.023663), 2008-10-03

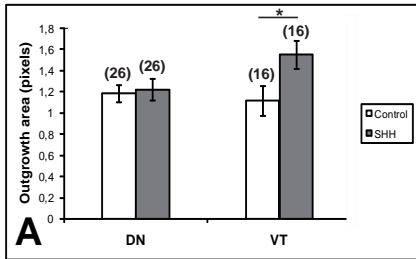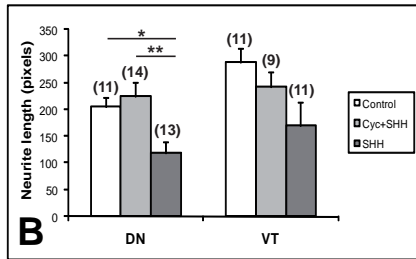

Supplement: dev023663-sup-023663figs1.pdf [file dev023663-sup-023663figs1.pdf]

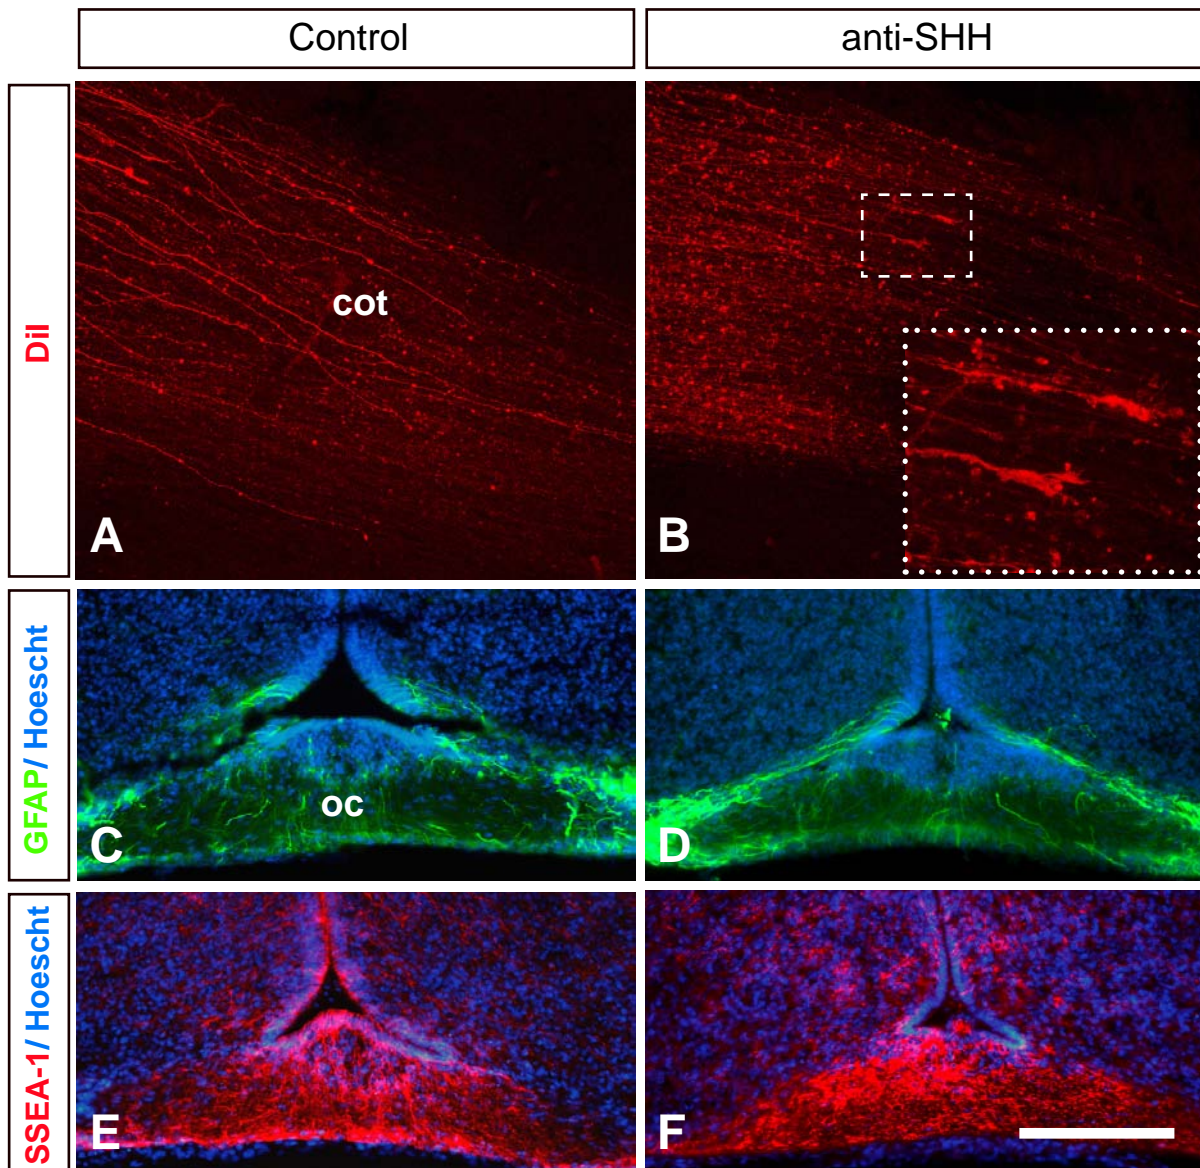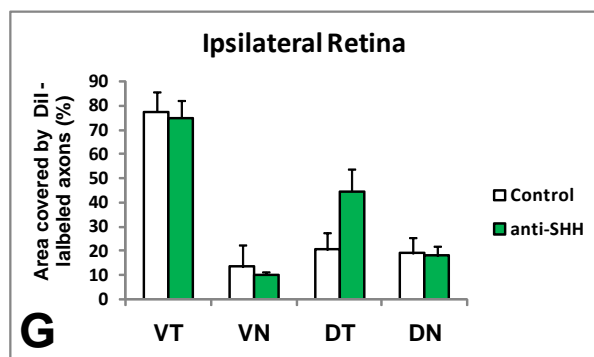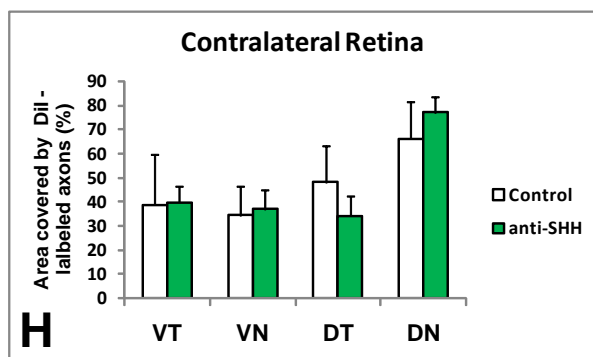

Supplement: dev023663-sup-023663figs2.pdf [file dev023663-sup-023663figs2.pdf]

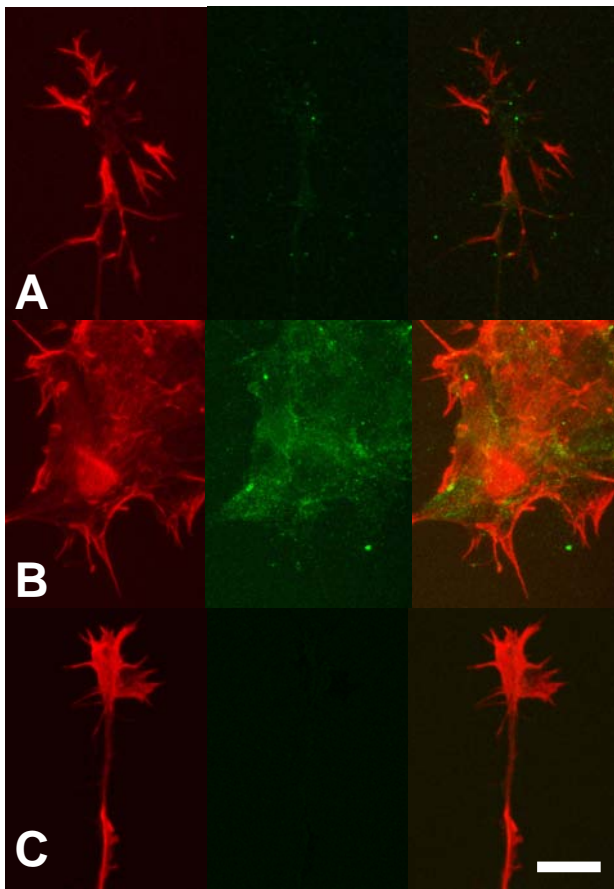

Supplement: dev023663-sup-023663figs3.pdf [file dev023663-sup-023663figs3.pdf]

*EGFP* + anti-SHH

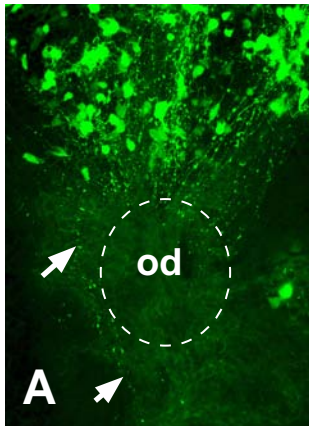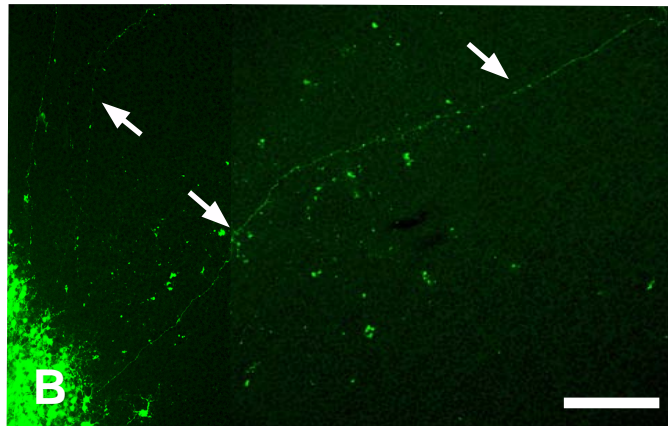

Supplement: dev023663-sup-023663figs4.pdf [file dev023663-sup-023663figs4.pdf]
